# Supplementary material for: Release of endothelial cell associated VEGFR2 during TGF-β modulated angiogenesis in vitro
Source: PubMed Central journal article supplement (PMC5260130; doi:10.1186/s12860-017-0127-y), 2017-01-23
Supplement: 12860_2017_127_MOESM2_ESM.pdf [file 12860_2017_127_MOESM2_ESM.pdf]

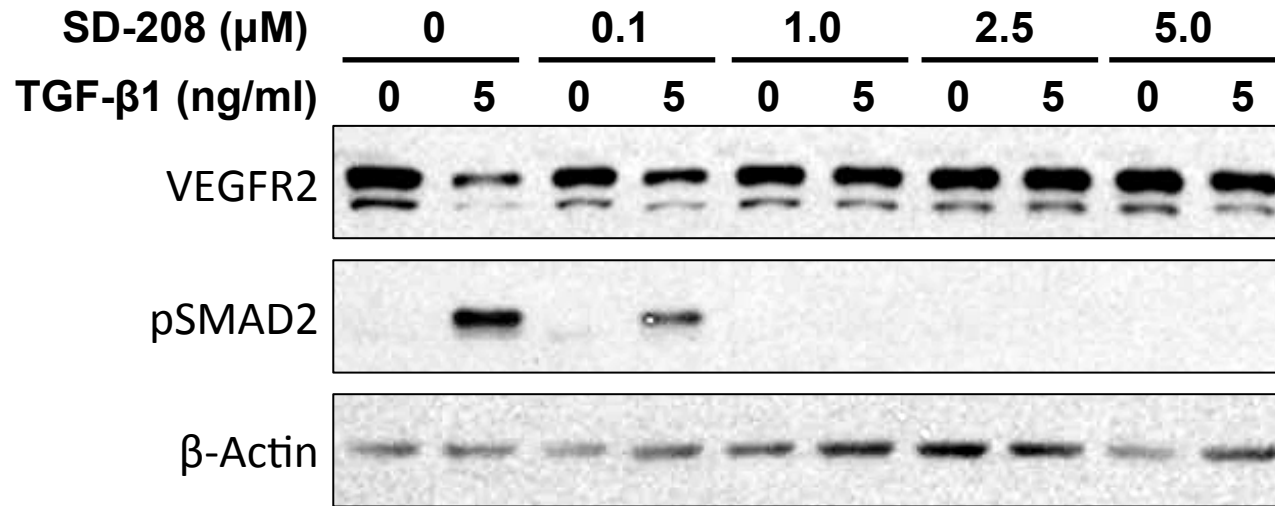

**Supplemental Figure 2: ALK5 inhibitor SD-208 prevents TGF- $\beta$ 1 induced downregulation of VEGFR2 expression.**

Western blots showing impact of increases doses of SD-208 on BAEC treated with DMSO vehicle (0) or 5 ng/ml TGF- $\beta$ 1 for 24 hours.
